# Supplementary material for: Neurofeedback Training Based on Motor Imagery Strategies Increases EEG Complexity in Elderly Population
Source: MDPI journal article supplement (doi:10.3390/e23121574), 2021-11-25
Supplement: s1 [file s1]

# Supplementary Materials: Neurofeedback Training Based on Motor Imagery Strategies Increases EEG Complexity in Elderly Population

Diego Marcos-Martínez , Víctor Martínez-Cagigal , Eduardo Santamaría-Vázquez , Sergio Pérez-Velasco  and Roberto Hornero 

For the sake of completeness, MSE curves obtained for the different parameter values are shown below. The values considered were: embedding dimension  $m = \{1, 2\}$ ; tolerance parameter  $r = \{0.1, 0.15, 0.2, 0.25, 0.3\}$ .

## 1. Embedding Dimmension $m = 1$

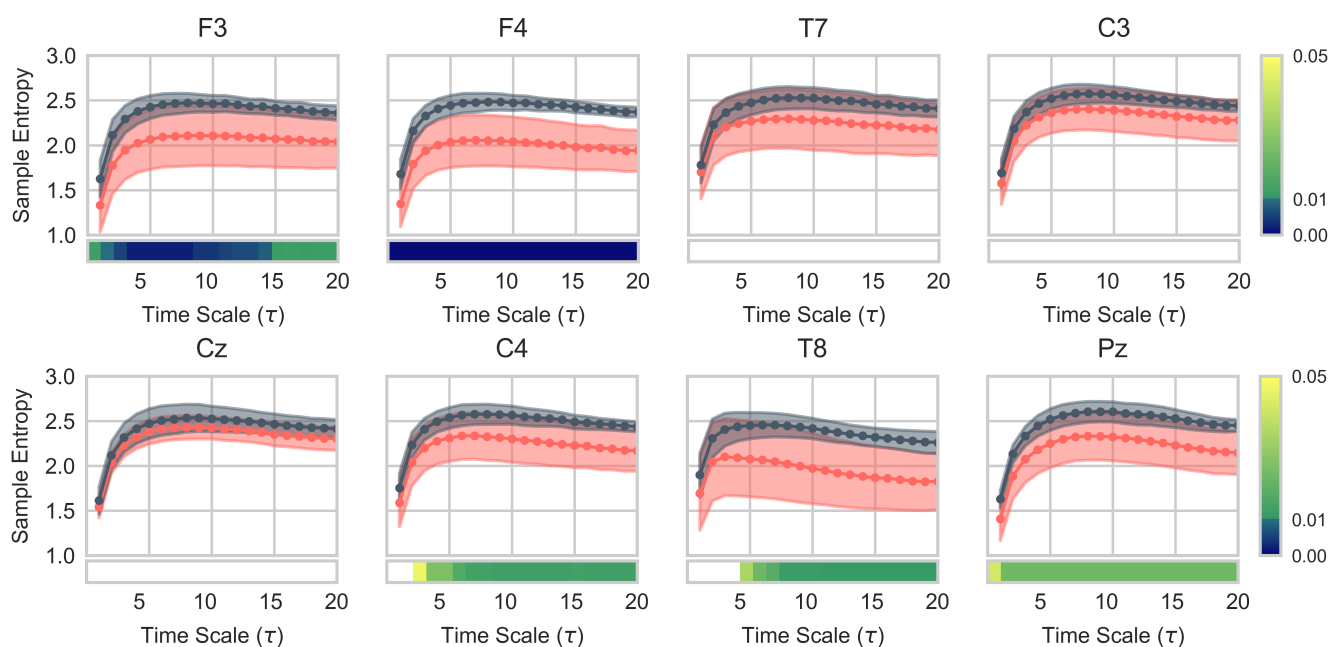

**Figure S1.** MSE values across channels ( $m = 1$ ;  $r = 0.1$ ). Lines with circle markers indicate pre- (red) and post-training (grey) averaged sample entropy values. Significant differences ( $p < 0.05$ ) for each time scale are shown in the bottom bars.  $P$ -values were corrected with FDR-BH correction.

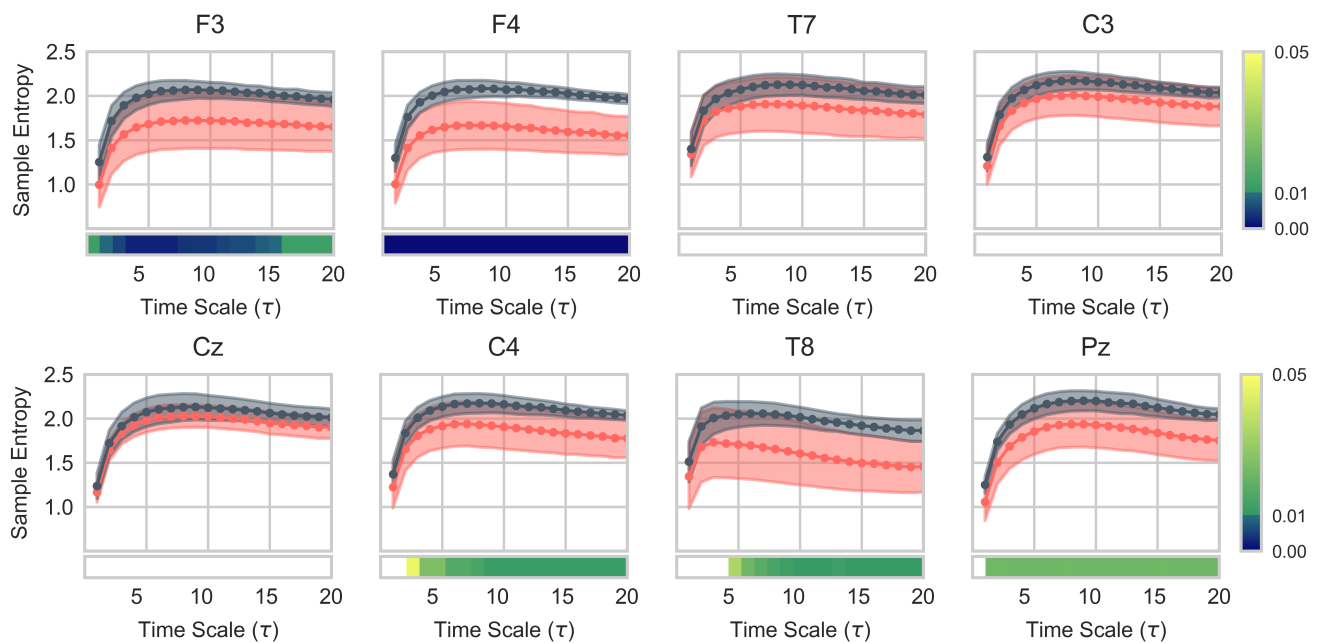

**Figure S2.** MSE values across channels ( $m = 1$ ;  $r = 0.15$ ). Lines with circle markers indicate pre- (red) and post-training (grey) averaged sample entropy values. Significant differences ( $p < 0.05$ ) for each time scale are shown in the bottom bars.  $P$ -values were corrected with FDR-BH correction.

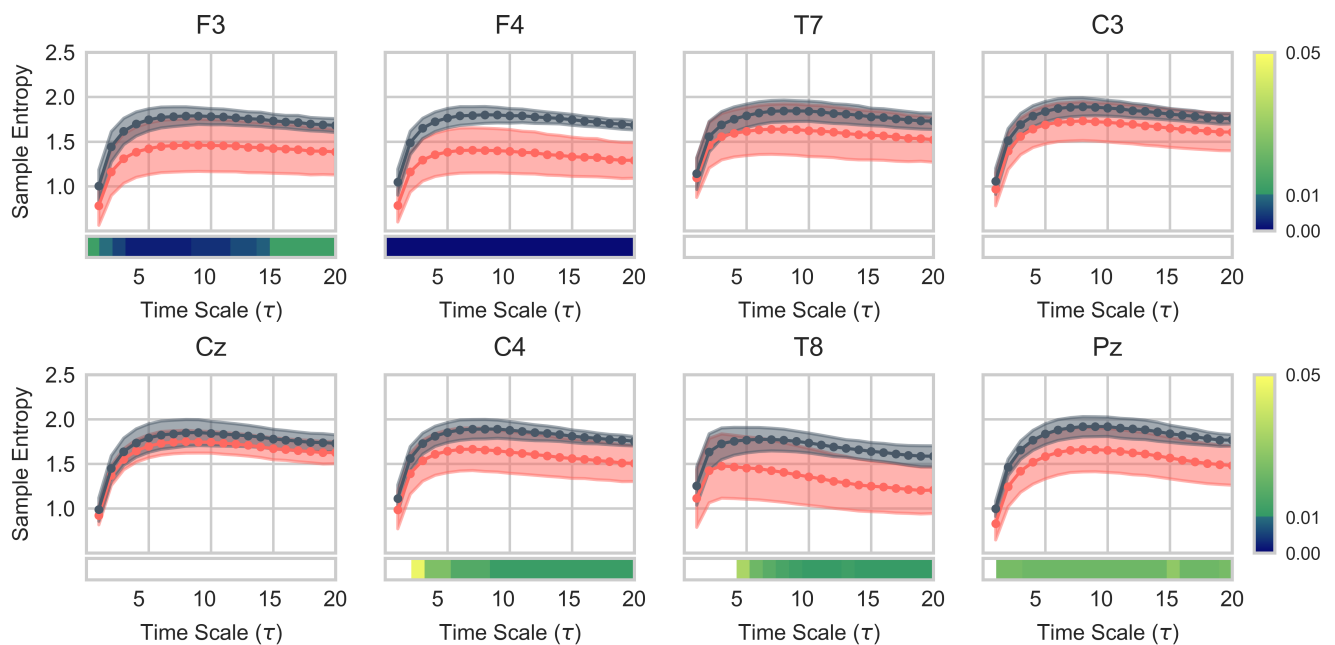

**Figure S3.** MSE values across channels ( $m = 1$ ;  $r = 0.2$ ). Lines with circle markers indicate pre- (red) and post-training (grey) averaged sample entropy values. Significant differences ( $p < 0.05$ ) for each time scale are shown in the bottom bars.  $P$ -values were corrected with FDR-BH correction.

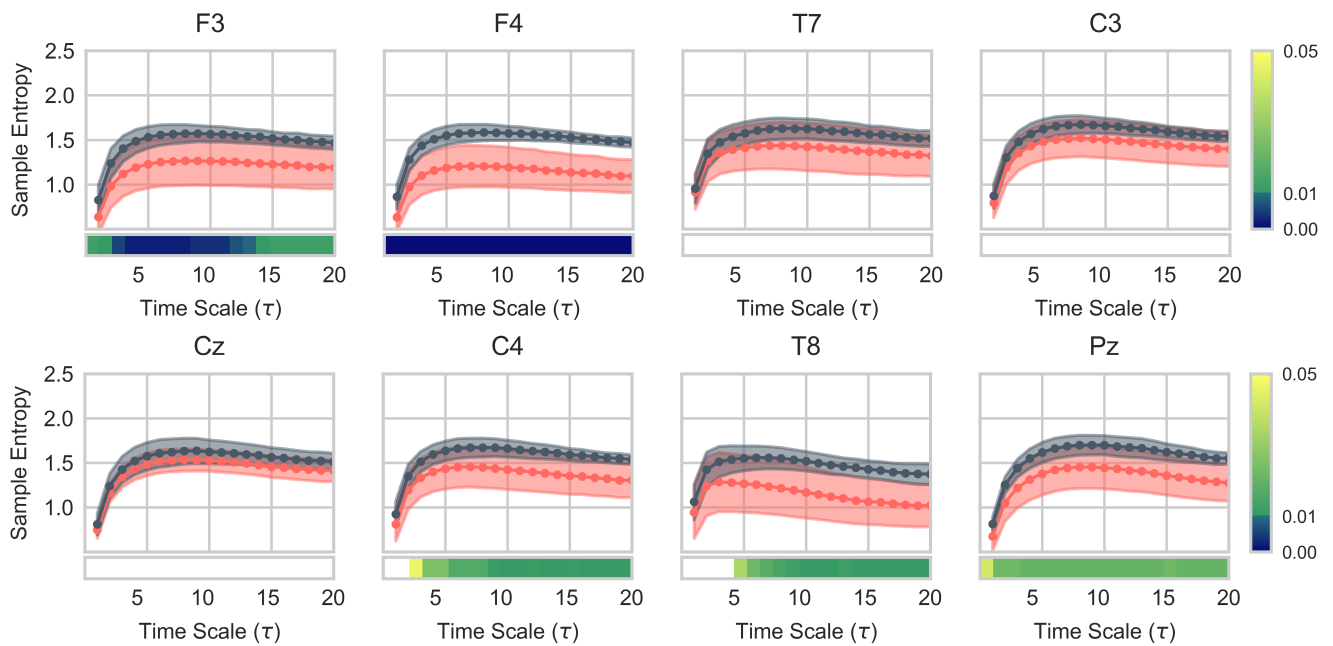

**Figure S4.** MSE values across channels ( $m = 1$ ;  $r = 0.25$ ). Lines with circle markers indicate pre- (red) and post-training (grey) averaged sample entropy values. Significant differences ( $p < 0.05$ ) for each time scale are shown in the bottom bars.  $P$ -values were corrected with FDR-BH correction.

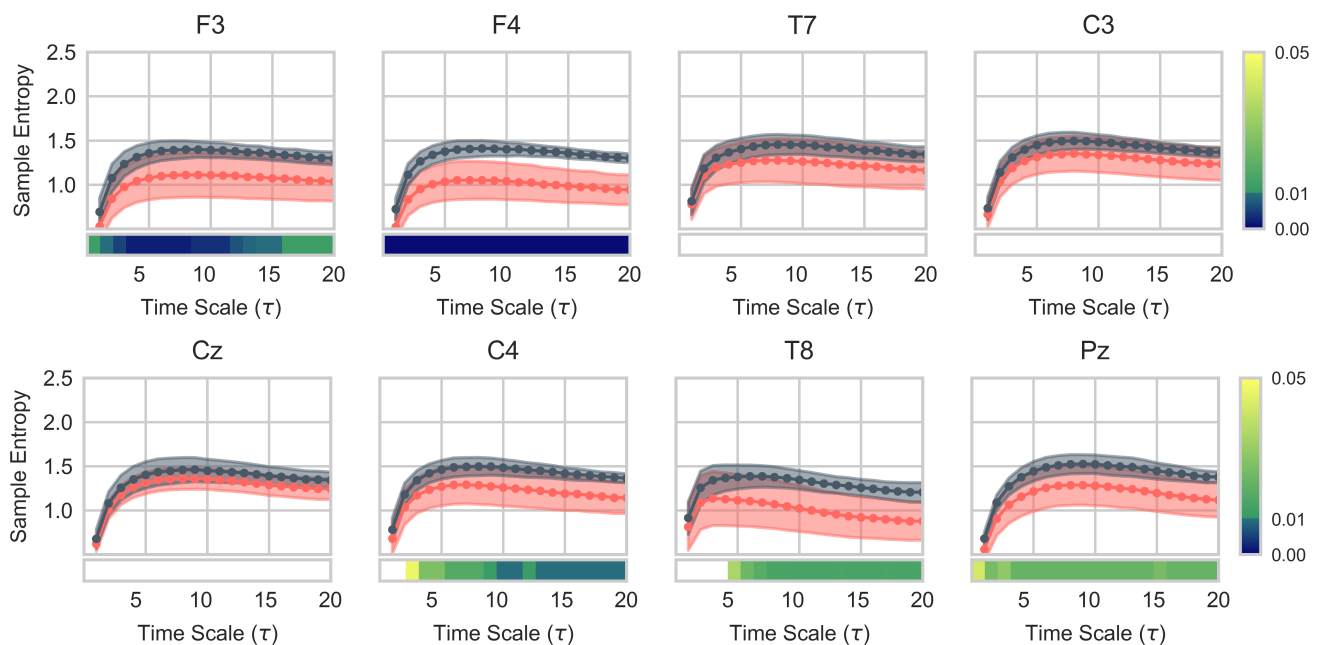

**Figure S5.** MSE values across channels ( $m = 1$ ;  $r = 0.3$ ). Lines with circle markers indicate pre- (red) and post-training (grey) averaged sample entropy values. Significant differences ( $p < 0.05$ ) for each time scale are shown in the bottom bars.  $P$ -values were corrected with FDR-BH correction.

## 2. Embedding Dimmension $m = 2$

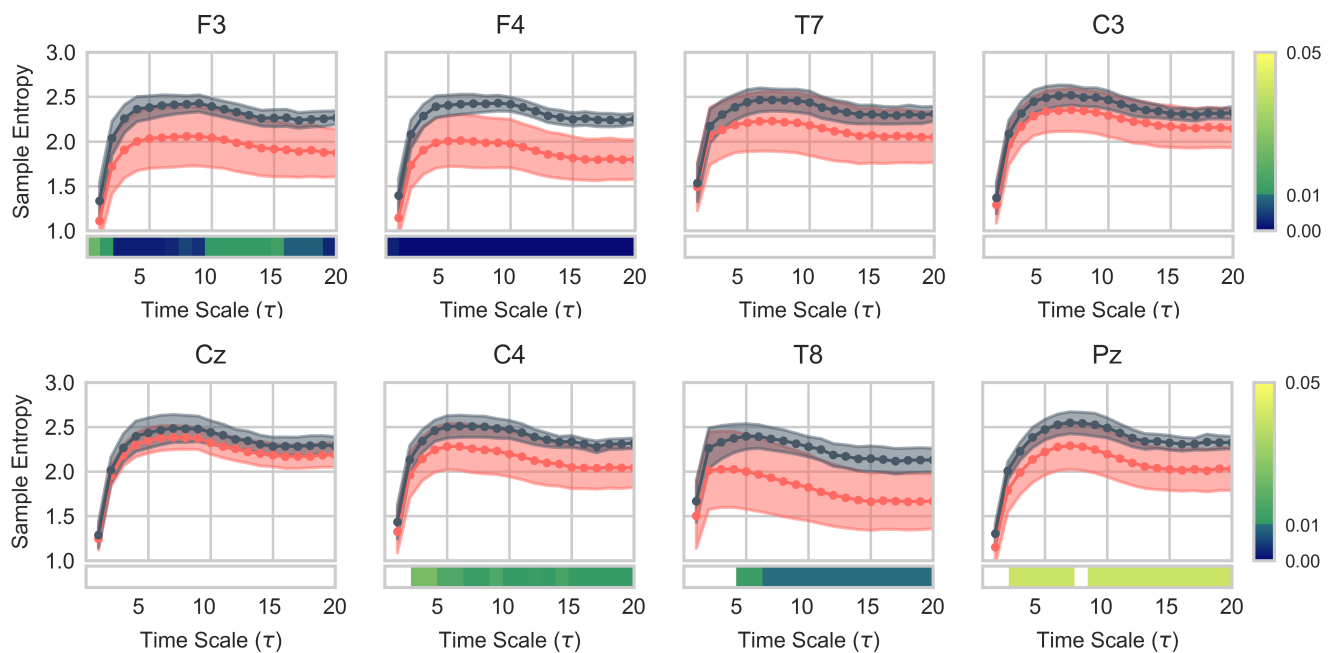

**Figure S6.** MSE values across channels ( $m = 2$ ;  $r = 0.1$ ). Lines with circle markers indicate pre- (red) and post-training (grey) averaged sample entropy values. Significant differences ( $p < 0.05$ ) for each time scale are shown in the bottom bars.  $P$ -values were corrected with FDR-BH correction.

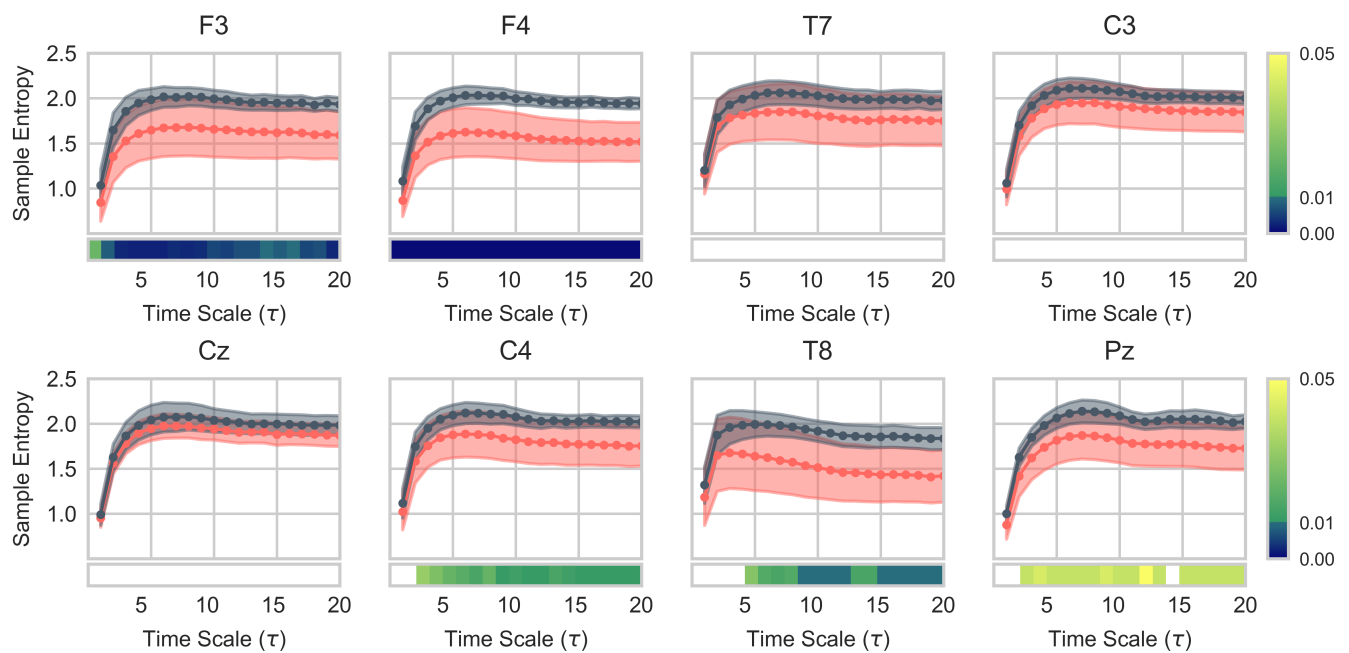

**Figure S7.** MSE values across channels ( $m = 2$ ;  $r = 0.15$ ). Lines with circle markers indicate pre- (red) and post-training (grey) averaged sample entropy values. Significant differences ( $p < 0.05$ ) for each time scale are shown in the bottom bars.  $P$ -values were corrected with FDR-BH correction.

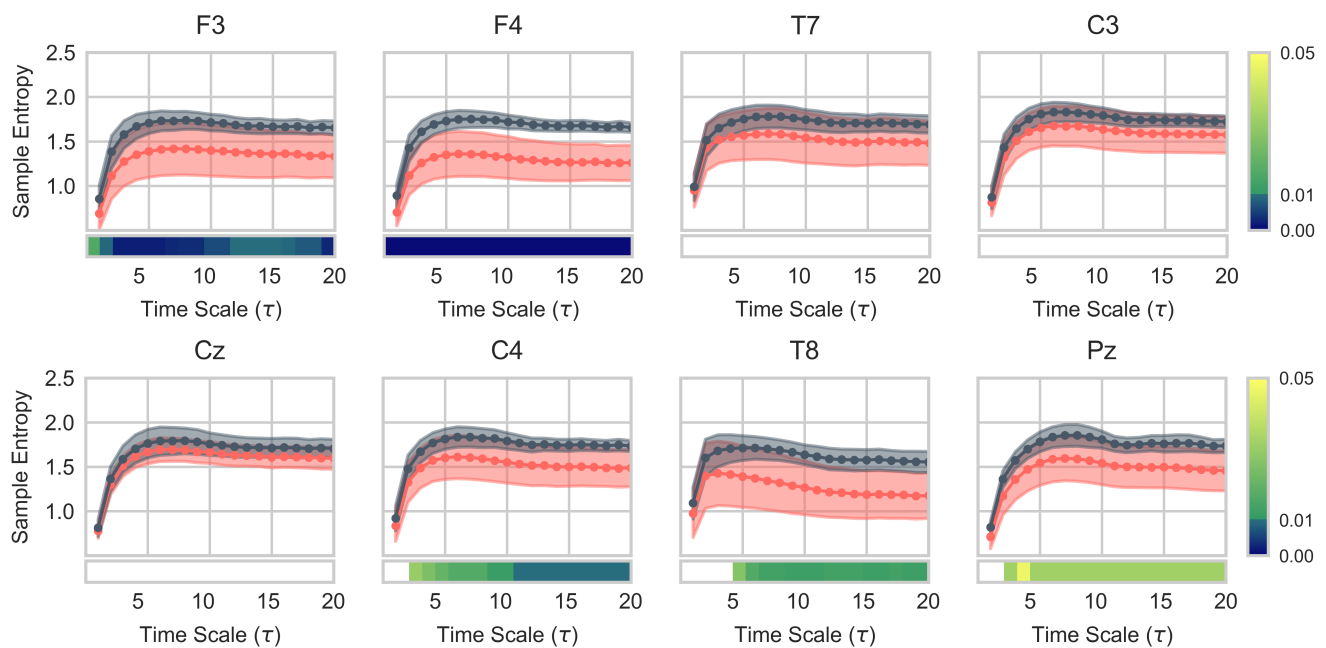

**Figure S8.** MSE values across channels ( $m = 2$ ;  $r = 0.2$ ). Lines with circle markers indicate pre- (red) and post-training (grey) averaged sample entropy values. Significant differences ( $p < 0.05$ ) for each time scale are shown in the bottom bars.  $P$ -values were corrected with FDR-BH correction.

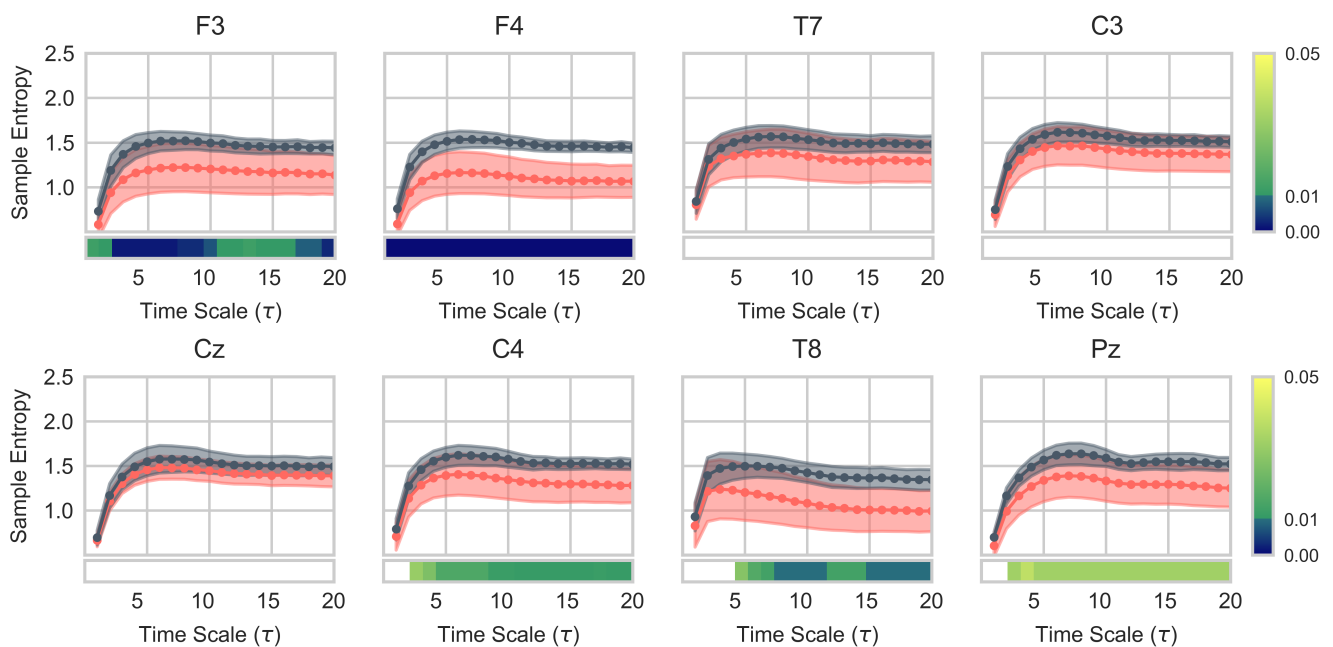

**Figure S9.** MSE values across channels ( $m = 2$ ;  $r = 0.25$ ). Lines with circle markers indicate pre- (red) and post-training (grey) averaged sample entropy values. Significant differences ( $p < 0.05$ ) for each time scale are shown in the bottom bars.  $P$ -values were corrected with FDR-BH correction.

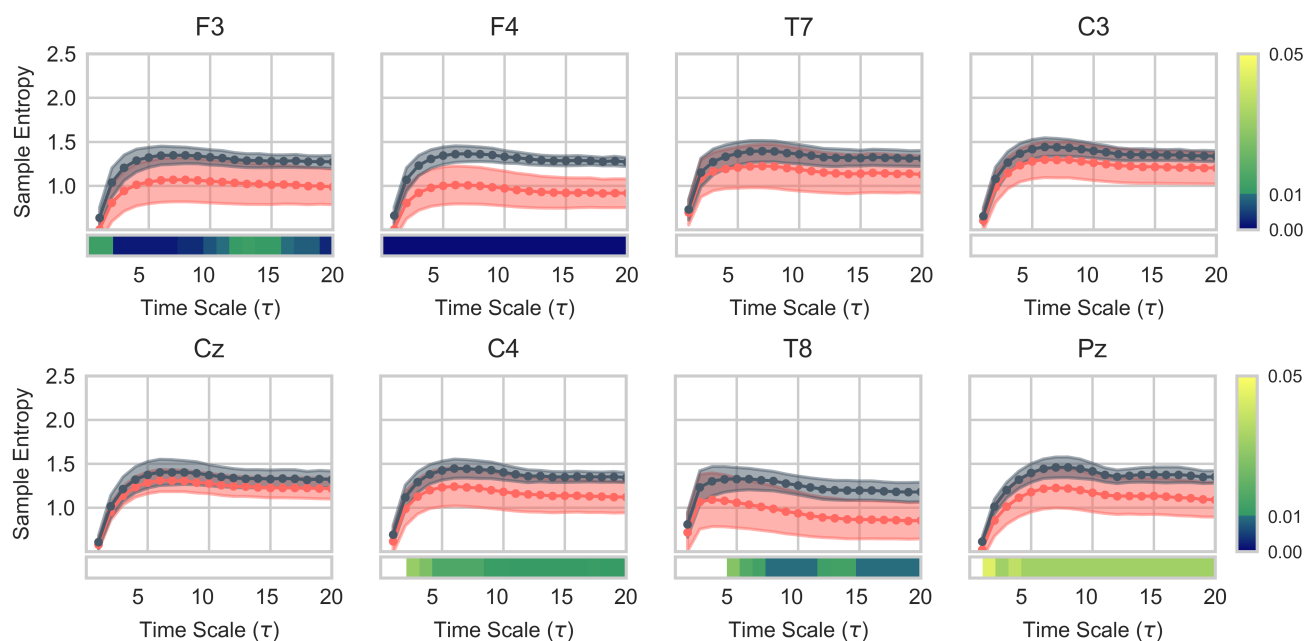

**Figure S10.** MSE values across channels ( $m = 2$ ;  $r = 0.3$ ). Lines with circle markers indicate pre- (red) and post-training (grey) averaged sample entropy values. Significant differences ( $p < 0.05$ ) for each time scale are shown in the bottom bars.  $P$ -values were corrected with FDR-BH correction.
